# Supplementary material for: Polarity reversal and strain modulation of Janus MoSSe/GaN polar semiconductor heterostructures
Source: Royal Society of Chemistry journal article supplement (doi:10.1039/d3cp02137h), 2023-01-01
Supplement: d3cp02137h1.pdf [file d3cp02137h1.pdf]

## Supplementary Information

### Polarity reversal and strain modulation of Janus MoSSe/GaN Polar semiconductor heterostructures

Delin Kong, Feng Tian, Yingying Xu, Shaoqun Zhu, Zetong Yu, Lefeng Xiong,  
Peipei Li, Huiyun Wei, Xinhe Zheng\*, Mingzeng Peng\*

*Beijing Key Laboratory for Magneto-Photoelectrical Composite and Interface  
Science, School of Mathematics and Physics, University of Science and Technology  
Beijing, No. 30, Xueyuan Road, Beijing 100083, China*

\*Corresponding author: mzpeng@ustb.edu.cn, xinhezhen@ustb.edu.cn

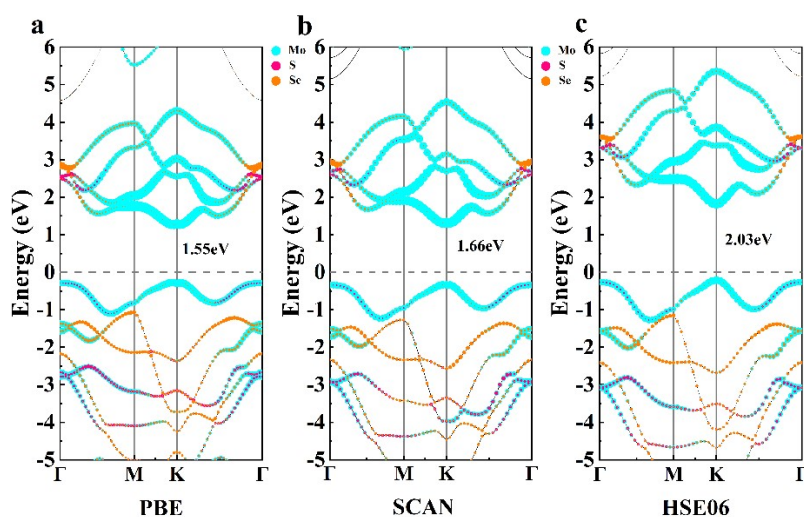

**Figure S1.** Calculated bandstructures of monolayer Janus MoSSe by using (a) PBE, (b) SCAN, and (c) HSE06 functionals, respectively.

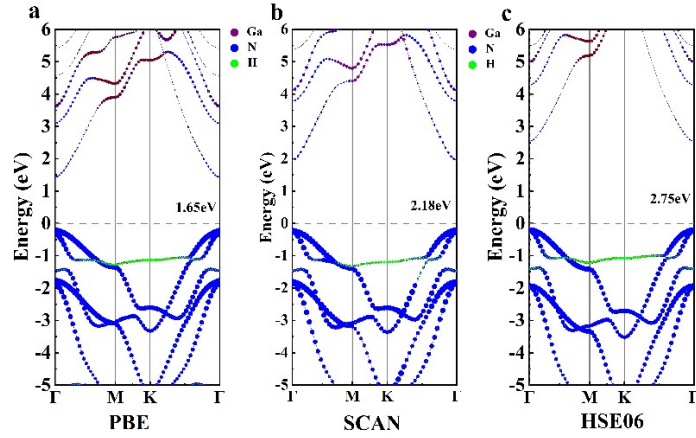

**Figure S2.** Calculated bandstructures of GaN by using (a) PBE, (b) SCAN, and (c) HSE06 functionals, respectively.

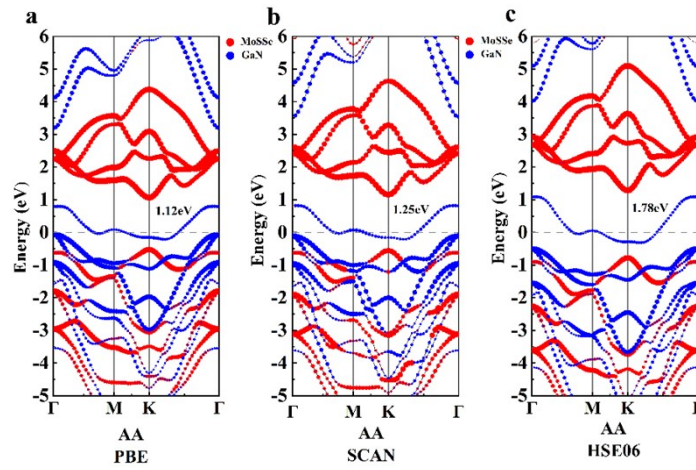

**Figure S3.** Calculated bandstructures of Janus MoSSe/GaN heterojunctions in AA configuration by using (a) PBE, (b) SCAN, and (c) HSE06 functionals, respectively.

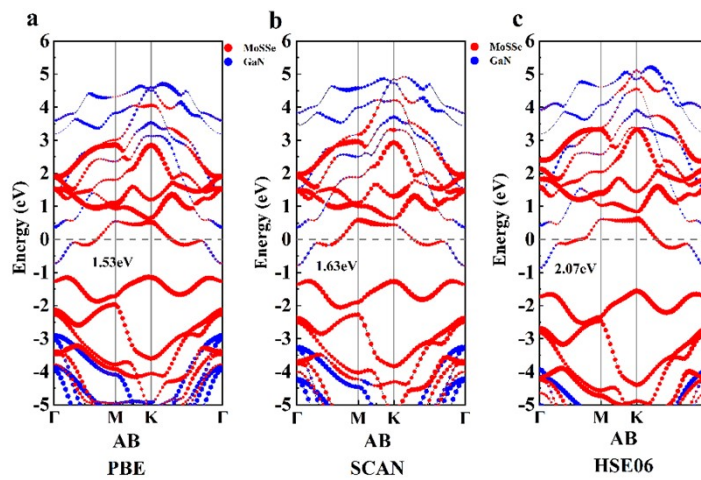

**Figure S4.** Calculated bandstructures of Janus MoSSe/GaN heterojunctions in AB configuration by using (a) PBE, (b) SCAN, and (c) HSE06 functionals, respectively.

**Table S1.** Binding energy of Janus MoSSe/GaN heterojunctions in the AA configuration and their energy before and after optimization.

| AA                              | -10%   | -6%    | 0      | +6%    | +10%   |
|---------------------------------|--------|--------|--------|--------|--------|
| Energy before optimization (eV) | -42.89 | -45.01 | -      | -45.32 | -44.29 |
| Energy after optimization (eV)  | -43.84 | -45.02 | -46.01 | -45.43 | -44.6  |
| Binding energy (eV)             | -0.01  | -0.04  | -0.08  | -0.35  | -0.45  |

**Table S2.** Binding energy of Janus MoSSe/GaN heterojunctions in the AA' configuration and their energy before and after optimization.

| AA'                             | -10%   | -6%    | 0     | +6%    | +10%   |
|---------------------------------|--------|--------|-------|--------|--------|
| Energy before optimization (eV) | -43.15 | -45.16 | -     | -45.46 | -44.51 |
| Energy after optimization (eV)  | -43.16 | -45.17 | -46.1 | -45.61 | -45.04 |
| Binding energy (eV)             | -0.09  | -0.29  | -0.17 | -0.81  | -1     |

**Table S3.** Binding energy of Janus MoSSe/GaN heterojunctions in the AB configuration and their energy before and after optimization.

| AB                              | -10%  | -6%    | 0      | +6%    | +10%   |
|---------------------------------|-------|--------|--------|--------|--------|
| Energy before optimization (eV) | -44.7 | -46.66 | -      | -46.94 | -46.94 |
| Energy after optimization (eV)  | -44.7 | -46.88 | -47.57 | -47.09 | -47.09 |
| Binding energy (eV)             | -0.05 | -0.15  | -0.24  | -0.42  | -0.5   |

**Table S4.** Binding energy of Janus MoSSe/GaN heterojunctions in the AB' configuration and their energy before and after optimization.

| AB'                             | -10%   | -6%    | 0      | +6%    | +10%   |
|---------------------------------|--------|--------|--------|--------|--------|
| Energy before optimization (eV) | -44.87 | -46.84 | -      | -47.13 | -46.22 |
| Energy after optimization (eV)  | -45.56 | -47.04 | -47.69 | -47.33 | -46.73 |
| Binding energy (eV)             | -0.2   | -0.37  | -0.42  | -0.6   | -0.69  |
